# Supplementary material for: Grading of Intraventricular Hemorrhage and Neurodevelopment in Preterm <29 Weeks’ GA in Canada
Source: MDPI journal article supplement (doi:10.3390/children9121948), 2022-12-12
Supplement: s1 [file s1]

## Supplementary

**Table S1.** Comparison of outcomes at 18–24 months corrected age among IVH groups among infants born <26 weeks gestation.

| Outcome | Level                 | Unadjusted Odds Ratio<br>(95% CI) | Adjusted Odds Ratio<br>(95% CI) <sup>1</sup> | Adjusted Odds Ratio<br>(95% CI) <sup>2</sup> |
|---------|-----------------------|-----------------------------------|----------------------------------------------|----------------------------------------------|
| NDI     | Grade I–II vs. No IVH | 0.94 (0.66, 1.34)                 | 0.86 (0.59, 1.26)                            | 0.86 (0.59, 1.26)                            |
|         | Grade III vs. No IVH  | 3.15 (1.40, 7.12)                 | 2.76 (1.15, 6.66)                            | 2.84 (1.17, 6.86)                            |
|         | Grade IV vs. No IVH   | 2.29 (1.34, 3.93)                 | 2.01 (1.13, 3.58)                            | 2.01 (1.13, 3.59)                            |
| sNDI    | Grade I–II vs. No IVH | 1.30 (0.84, 2.02)                 | 1.26 (0.79, 2.02)                            | 1.24 (0.77, 2.00)                            |
|         | Grade III vs. No IVH  | 2.45 (1.17, 5.10)                 | 2.35 (1.06, 5.22)                            | 2.59 (1.15, 5.87)                            |
|         | Grade IV vs. No IVH   | 3.91 (2.31, 6.60)                 | 3.53 (1.97, 6.33)                            | 3.40 (1.87, 6.17)                            |

Abbreviations: CI—confidence interval; NDI—neurodevelopmental impairment; sNDI—significant neurodevelopmental impairment.

<sup>1</sup>Adjusted for gestational age, antenatal corticosteroids, sex, small for gestational age, outborn, cesarean delivery, maternal hypertension, Score for Neonatal Acute Physiology-II, early onset sepsis and center.

<sup>2</sup>Adjusted for gestational age, antenatal corticosteroids, sex, small for gestational age, outborn, cesarean delivery, maternal hypertension, Score for Neonatal Acute Physiology-II, sepsis, necrotizing enterocolitis, bronchopulmonary dysplasia, retinopathy of prematurity, and center.

“No IVH” as the reference group.

**Table S2.** Comparison of outcomes at 18–24 months corrected age among IVH groups among infants born between 26–28<sup>6/7</sup> weeks gestation.

| Outcome | Level                 | Unadjusted Odds Ratio<br>(95% CI) | Adjusted Odds Ratio<br>(95% CI) <sup>1</sup> | Adjusted Odds Ratio<br>(95% CI) <sup>2</sup> |
|---------|-----------------------|-----------------------------------|----------------------------------------------|----------------------------------------------|
| NDI     | Grade I–II vs. No IVH | 1.15 (0.91, 1.46)                 | 1.12 (0.86, 1.46)                            | 1.11 (0.85, 1.45)                            |
|         | Grade III vs. No IVH  | 2.45 (1.43, 4.19)                 | 2.37 (1.26, 4.45)                            | 2.34 (1.24, 4.40)                            |
|         | Grade IV vs. No IVH   | 3.57 (2.27, 5.60)                 | 3.11 (1.92, 5.05)                            | 3.01 (1.84, 4.91)                            |
| sNDI    | Grade I–II vs. No IVH | 1.66 (1.18, 2.35)                 | 1.60 (1.08, 2.38)                            | 1.60 (1.08, 2.38)                            |
|         | Grade III vs. No IVH  | 5.56 (3.17, 9.77)                 | 4.97 (2.48, 9.97)                            | 4.95 (2.45, 9.98)                            |
|         | Grade IV vs. No IVH   | 5.71 (3.61, 9.03)                 | 5.93 (3.50, 10.0)                            | 5.60 (3.29, 9.52)                            |

Abbreviations: CI—confidence interval; NDI—neurodevelopmental impairment; sNDI—significant neurodevelopmental impairment.

<sup>1</sup>Adjusted for gestational age, antenatal corticosteroids, sex, small for gestational age, outborn, cesarean delivery, maternal hypertension, Score for Neonatal Acute Physiology-II, early onset sepsis and center.

<sup>2</sup>Adjusted for gestational age, antenatal corticosteroids, sex, small for gestational age, outborn, cesarean delivery, maternal hypertension, Score for Neonatal Acute Physiology-II, sepsis, necrotizing enterocolitis, bronchopulmonary dysplasia, retinopathy of prematurity, and center.

“No IVH” as the reference group.
